# Supplementary material
Source: PubMed Central journal article supplement (PMC3196450)
Supplement: supp_85_19_9899__1.pdf [file supp_85_19_9899__1.pdf]

**FIG. S1. Expression of VACV mRNAs at 0 and 0.5 h after removal of HU.**

HeLa cells were infected with vRO-G8R in the presence or absence of IPTG as outlined in Fig. 1 and the legend to Fig. 2. After removal of HU, polyadenylated RNA was isolated at 0 and 0.5 h and cDNAs were made and sequenced. Read counts per nucleotide were plotted along the complete VACV ORF map. Counts above and below the line represent RNAs transcribed from the top DNA strand in the rightward direction and from the bottom strand in the leftward direction, respectively. ORFs are indicated by arrows; the letters at the bottom represent HindIII fragments. (A) –IPTG, +CHX. (B) +IPTG, –CHX. The length of the genome (194, 711 bp) is indicated.
