# Supplementary material
Source: PubMed Central journal article supplement (PMC3196450)
Supplement: supp_85_19_9899__3.pdf [file supp_85_19_9899__3.pdf]

Table S1. Temporal expression of VACV post-replicative genes

| VACV WR | VACV COP    | Temporal expression <sup>a</sup> | Functional categories <sup>b</sup>                                                                               |
|---------|-------------|----------------------------------|------------------------------------------------------------------------------------------------------------------|
| 3       | no ortholog | NE                               | Pseudogene, unknown                                                                                              |
| 8       | C19L        | L                                | Truncated; ankyrin-like, unknown                                                                                 |
| 20      | C8L         | L                                | Unknown                                                                                                          |
| 25      | C3L         | L                                | Host interaction                                                                                                 |
| 33      | K2L         | I                                | Host interaction; EV membrane protein                                                                            |
| 35      | K4L         | I                                | DNA replication, core-associated enzymes and transcriptional factors                                             |
| 48      | F9L         | L                                | MV-associated membrane protein; EFC; S-S bond formation pathway                                                  |
| 49      | F10L        | L                                | Core-associated enzymes and transcriptional factors; required for morphogenesis; required for crescent formation |
| 52      | F13L        | I                                | EV membrane protein                                                                                              |
| 56      | F17R        | L                                | Core-associated non-enzymatic proteins; DNA-binding or packaging proteins; required for morphogenesis            |
| 62      | E6R         | I                                | Required for morphogenesis; required for transcription                                                           |
| 63      | E7R         | I                                | Unknown                                                                                                          |
| 64      | E8R         | I                                | Core-associated non-enzymatic proteins                                                                           |
| 66      | E10R        | L                                | MV membrane-associated proteins; S-S bond formation pathway; required for morphogenesis                          |
| 67      | E11R        | I                                | Core-associated non-enzymatic proteins                                                                           |
| 69      | O2L         | I                                | Core-associated enzymes and transcriptional factors                                                              |
| 69.5    | O3L         | I                                | MV membrane-associated proteins; EFC                                                                             |
| 70      | I1L         | I                                | Core-associated non-enzymatic proteins; required for morphogenesis; DNA-binding and packing proteins             |
| 71      | I2L         | L                                | MV membrane-associated proteins; EFC                                                                             |
| 74      | I5L         | I                                | MV membrane-associated proteins                                                                                  |
| 75      | I6L         | I                                | Core-associated non-enzymatic proteins; required for morphogenesis; DNA-binding or packaging proteins            |
| 76      | I7L         | L                                | Core-associated enzymes and transcriptional factors; required for morphogenesis                                  |
| 77      | I8R         | I                                | Core-associated enzymes and transcriptional factors; transcription, early stage.                                 |
| 78      | G1L         | L                                | Core-associated enzymes and transcriptional factors                                                              |
| 79      | G3L         | L                                | MV membrane-associated proteins; EFC                                                                             |
| 81      | G4L         | I                                | MV membrane-associated proteins; S-S bond formation pathway; required for morphogenesis                          |

|            |       |   |                                                                                                                                                |
|------------|-------|---|------------------------------------------------------------------------------------------------------------------------------------------------|
| <b>84</b>  | G6R   | L | Host interaction                                                                                                                               |
| <b>85</b>  | G7L   | L | Core-associated non-enzymatic proteins and transcriptional factors; required for morphogenesis                                                 |
| <b>86</b>  | G8R   | I | Transcription, late stage                                                                                                                      |
| <b>87</b>  | G9R   | L | MV membrane-associated proteins; EFC                                                                                                           |
| <b>88</b>  | L1R   | L | MV membrane-associated proteins; S-S bond formation pathway; EFC                                                                               |
| <b>90</b>  | L3L   | L | Core-associated non-enzymatic proteins; transcription, early stage                                                                             |
| <b>91</b>  | L4R   | I | Core-associated non-enzymatic proteins; DNA-binding proteins; transcription, early stage                                                       |
| <b>92</b>  | L5R   | L | MV membrane-associated proteins; EFC                                                                                                           |
| <b>93</b>  | J1R   | I | Core-associated non-enzymatic proteins                                                                                                         |
| <b>97</b>  | J5L   | L | MV membrane-associated proteins; EFC; required for morphogenesis                                                                               |
| <b>99</b>  | H1L   | I | Core-associated enzymes and transcriptional factors; transcription, early stage                                                                |
| <b>100</b> | H2R   | L | MV membrane-associated proteins; EFC                                                                                                           |
| <b>101</b> | H3L   | I | MV membrane-associated proteins                                                                                                                |
| <b>102</b> | H4L   | L | Core-associated enzymes and transcriptional factors; required for morphogenesis; DNA-binding or packaging proteins; transcription, early stage |
| <b>104</b> | H6R   | L | Core-associated enzymes and transcriptional factors; required for morphogenesis; DNA-binding or packaging proteins; transcription              |
| <b>105</b> | H7R   | I | Contributes to the Formation of Crescent Membrane Precursors of Immature virions                                                               |
| <b>107</b> | D2L   | L | Required for morphogenesis; required for crescent formation                                                                                    |
| <b>108</b> | D3R   | L | Core-associated non-enzymatic proteins; required for morphogenesis                                                                             |
| <b>111</b> | D6R   | I | Core-associated enzymes and transcriptional factors; DNA-binding and packing proteins; transcription, early stage                              |
| <b>113</b> | D8L   | I | MV membrane-associated proteins                                                                                                                |
| <b>115</b> | D10R  | I | Host interaction                                                                                                                               |
| <b>116</b> | D11L  | I | Core-associated enzymes and transcriptional factors; Transcription                                                                             |
| <b>118</b> | D13L  | I | Required for morphogenesis; required for crescent formation                                                                                    |
| <b>119</b> | A1L   | I | Transcription, late stage                                                                                                                      |
| <b>120</b> | A2L   | I | Transcription, late stage                                                                                                                      |
| <b>121</b> | A2.5L | L | MV membrane-associated proteins; S-S bond formation pathway; required for morphogenesis                                                        |
| <b>122</b> | A3L   | I | Core-associated non-enzymatic proteins; required for morphogenesis                                                                             |
| <b>125</b> | A6L   | I | Core-associated non-enzymatic proteins; required for morphogenesis                                                                             |

|       |             |    |                                                                                                                    |
|-------|-------------|----|--------------------------------------------------------------------------------------------------------------------|
| 126   | A7L         | L  | Core-associated enzymes and transcriptional factors; DNA-binding or packaging proteins; transcription, early stage |
| 128   | A9L         | L  | MV membrane-associated proteins; required for morphogenesis                                                        |
| 129   | A10L        | L  | Core-associated non-enzymatic proteins; required for morphogenesis                                                 |
| 130   | A11R        | L  | Required for morphogenesis; required for crescent formation                                                        |
| 131   | A12L        | I  | Core-associated non-enzymatic proteins                                                                             |
| 132   | A13L        | L  | MV membrane-associated proteins; required for morphogenesis                                                        |
| 133   | A14L        | L  | MV membrane-associated proteins; required for morphogenesis; required for crescent formation                       |
| 134   | A14.5L      | L  | MV membrane-associated proteins                                                                                    |
| 135   | A15L        | I  | Core-associated non-enzymatic proteins; required for morphogenesis                                                 |
| 136   | A16L        | I  | MV membrane-associated proteins; EFC                                                                               |
| 137   | A17L        | L  | MV membrane-associated proteins; required for morphogenesis; required for crescent formation                       |
| 139   | A19L        | I  | Unknown                                                                                                            |
| 140   | A21L        | L  | MV membrane-associated proteins; EFC                                                                               |
| 142   | A22R        | I  | DNA replication; DNA-binding and packing proteins                                                                  |
| 145   | no ortholog | NE | Pseudogene                                                                                                         |
| 146   | no ortholog | I  | Pseudogene                                                                                                         |
| 147   | no ortholog | I  | Pseudogene                                                                                                         |
| 148   | A25L        | I  | MV membrane-associated proteins; truncated                                                                         |
| 149   | A26L        | L  | MV membrane-associated proteins                                                                                    |
| 150   | A27L        | I  | MV membrane-associated proteins                                                                                    |
| 151   | A28L        | L  | MV membrane-associated proteins; EFC                                                                               |
| 153   | A30L        | I  | Core-associated non-enzymatic proteins; required for morphogenesis                                                 |
| 153.5 | A30.5L      | I  | Unknown                                                                                                            |
| 155   | A32L        | I  | Core-associated enzymes and transcriptional factors; DNA-binding or packaging proteins                             |
| 157   | A34R        | I  | EV membrane protein                                                                                                |
| 162   | A38L        | I  | CD47-like putative membrane protein                                                                                |
| 163   | A39R        | L  | Host interaction; truncated                                                                                        |
| 164   | no ortholog | I  | Pseudogene                                                                                                         |
| 167   | A42R        | I  | Profilin-like, trace amount found in MV                                                                            |
| 168   | A43R        | I  | Host interaction                                                                                                   |

|              |                |   |                                                     |
|--------------|----------------|---|-----------------------------------------------------|
| <b>171</b>   | A45R           | L | Core-associated enzymes and transcriptional factors |
| <b>179</b>   | A53R           | I | Host interaction                                    |
| <b>186</b>   | B4R            | I | Unknown, ankyrin-like                               |
| <b>189</b>   | B7R            | L | Host interaction                                    |
| <b>191</b>   | B9R            | I | Unknown                                             |
| <b>192</b>   | B10R           | I | Unknown                                             |
| <b>197</b>   | VACWR-<br>B15R | I | Host interaction                                    |
| <b>204.5</b> | no ortholog    | I | Unknown                                             |
| <b>206</b>   | C13L           | I | Unknown                                             |

<sup>a</sup> L, Late; I, Intermediate; NE, not expressed. Genes are classified as intermediate even if they also have a late promoter. Genes that are expressed early are not included even if they also have an intermediate or late promoter.

<sup>b</sup> EFC, Entry-Fusion Complex
