# Supplementary material
Source: PubMed Central journal article supplement (PMC3196450)

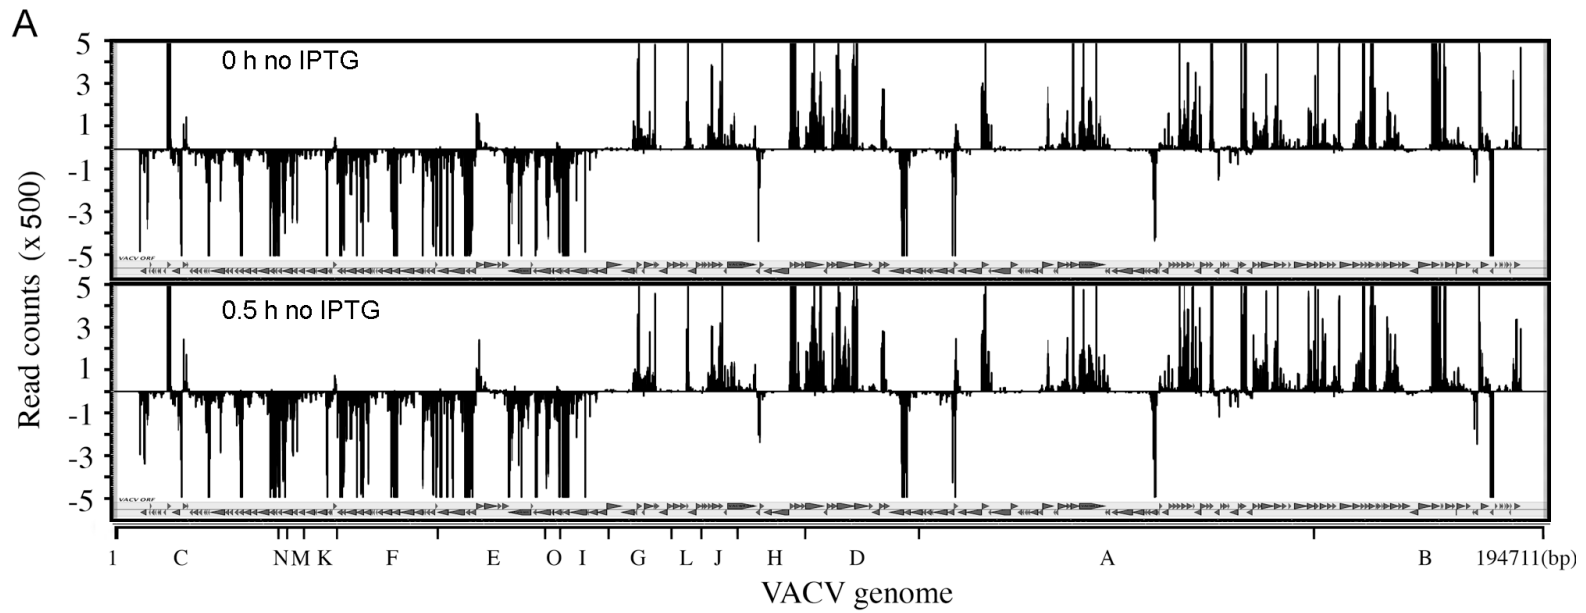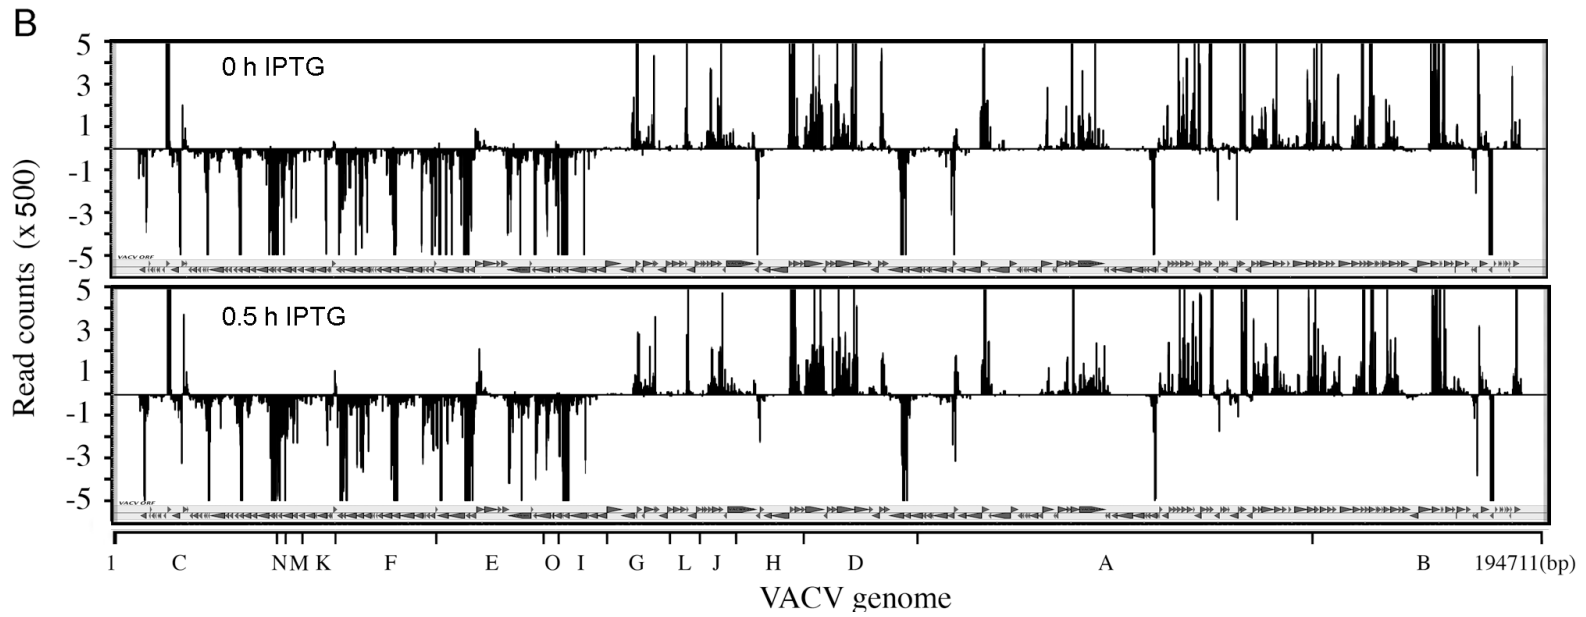

Supplement: supp_85_19_9899__2.pdf [file supp_85_19_9899__2.pdf]
